# Supplementary material
Source: publisher site journal article supplement (https://www.dovepress.com/article/396451)
Supplement: Supplementary file 1 [file get_supplementary_file.php]

**Supplementary Table 1.** The mediated indirect effect of indifference estimated by ordinary least squares regression on the association between adulthood betrayal trauma and numbers of items in PDI.

| **Outcome variable:** MOPS (indifference) A | | | | | |
| --- | --- | --- | --- | --- | --- |
| Predictors | β | SE | *p* | LLCI | ULCI |
| BBTS (adult-BT) | 1.406 | 0.445 | 0.003 | 0.516 | 2.296 |
| **Outcome variable:** numbers of items in PDI. B | | | | | |
| Predictors | β | SE | *p* | LLCI | ULCI |
| BBTS (adult-BT) | 0.668 | 0.213 | 0.003 | 0.240 | 1.095 |
| MOPS (indifference) | 0.117 | 0.059 | 0.054 | -0.001 | 0.235 |
| **Indirect effect of mediation** | β | SE | *p* | LLCI | ULCI |
| MOPS (indifference) | 0.165 | 0.096 | - | -0.008 | 0.366 |

LLCI: lower limit of 95% confidence interval; ULCI: upper limit of 95% confidence interval; β: regression coefficient; SE: standard error; MOPS: Measure of Parental Style; BBTS: Brief Betrayal Trauma Questionnaire; BT: betrayal trauma; NBT: non-betrayal trauma; PDI: Peters et al. Delusional Inventory.

A: Model F(1, 57) = 10.01; *p* < 0.05

B: Model F(2, 56) = 10.94; *p* < 0.05

**Supplementary Table 2.** The mediated indirect effect of over-control estimated by ordinary least squares regression on the association between adulthood betrayal trauma and numbers of items in PDI.

| **Outcome variable:** MOPS (over-control) A | | | | | |
| --- | --- | --- | --- | --- | --- |
| Predictors | β | SE | *p* | LLCI | ULCI |
| BBTS (adult-BT) | 0.920 | 0.230 | <0.001 | 0.459 | 1.381 |
| **Outcome variable:** numbers of items in PDI. B | | | | | |
| Predictors | β | SE | *p* | LLCI | ULCI |
| BBTS (adult-BT) | 0.725 | 0.229 | 0.002 | 0.268 | 1.183 |
| MOPS (over-control) | 0.117 | 0.116 | 0.321 | -0.116 | 0.349 |
| **Indirect effect of mediation** | β | SE | *p* | LLCI | ULCI |
| MOPS (over-control) | 0.107 | 0.137 | - | -0.141 | 0.401 |

LLCI: lower limit of 95% confidence interval; ULCI: upper limit of 95% confidence interval; β: regression coefficient; SE: standard error; MOPS: Measure of Parental Style; BBTS: Brief Betrayal Trauma Questionnaire; BT: betrayal trauma; NBT: non-betrayal trauma; PDI: Peters et al. Delusional Inventory.

A: Model F(1, 57) = 15.98; *p* < 0.05

B: Model F(2, 56) = 9.0; *p* < 0.05

**Supplementary Table 3.** The mediated indirect effect of indifference estimated by ordinary least squares regression on the association between adulthood betrayal trauma and conviction in PDI.

| **Outcome variable:** MOPS (indifference) A | | | | | |
| --- | --- | --- | --- | --- | --- |
| Predictors | β | SE | *p* | LLCI | ULCI |
| BBTS (adult-BT) | 1.406 | 0.445 | 0.003 | 0.516 | 2.296 |
| **Outcome variable:** conviction in PDI. B | | | | | |
| Predictors | β | SE | *p* | LLCI | ULCI |
| BBTS (adult-BT) | 3.353 | 10.13 | 0.002 | 1.323 | 5.383 |
| MOPS (indifference) | 0.625 | 0.279 | 0.029 | 0.067 | 1.183 |
| **Indirect effect of mediation** | β | SE | *p* | LLCI | ULCI |
| MOPS (indifference) | 0.878 | 0.493 | - | 0.053 | 1.975 |

LLCI: lower limit of 95% confidence interval; ULCI: upper limit of 95% confidence interval; β: regression coefficient; SE: standard error; MOPS: Measure of Parental Style; BBTS: Brief Betrayal Trauma Questionnaire; BT: betrayal trauma; NBT: non-betrayal trauma; PDI: Peters et al. Delusional Inventory.

A: Model F(1, 57) = 10.01; *p* < 0.05

B: Model F(2, 56) = 12.76; *p* < 0.05

**Supplementary Table 4.** The mediated indirect effect of over-control estimated by ordinary least squares regression on the association between adulthood betrayal trauma and conviction in PDI.

| **Outcome variable:** MOPS (over-control) A | | | | | |
| --- | --- | --- | --- | --- | --- |
| Predictors | β | SE | *p* | LLCI | ULCI |
| BBTS (adult-BT) | 0.920 | 0.230 | <0.001 | 0.459 | 1.381 |
| **Outcome variable:** conviction in PDI. B | | | | | |
| Predictors | β | SE | *p* | LLCI | ULCI |
| BBTS (adult-BT) | 3.646 | 1.091 | 0.002 | 1.459 | 5.832 |
| MOPS (over-control) | 0.636 | 0.555 | 0.257 | -0.476 | 1.749 |
| **Indirect effect of mediation** | β | SE | *p* | LLCI | ULCI |
| MOPS (over-control) | 0.585 | 0.633 | - | -0.574 | 1.984 |

LLCI: lower limit of 95% confidence interval; ULCI: upper limit of 95% confidence interval; β: regression coefficient; SE: standard error; MOPS: Measure of Parental Style; BBTS: Brief Betrayal Trauma Questionnaire; BT: betrayal trauma; NBT: non-betrayal trauma; PDI: Peters et al. Delusional Inventory.

A: Model F(1, 57) = 15.98; *p* < 0.05

B: Model F(2, 56) = 10.28; *p* < 0.05
